# Supplementary material for: High Incidence of a Novel Rickettsia Genotype in Parasitic Haemaphysalis longicornis from China-North Korea Border
Source: PubMed Central journal article supplement (PMC6440996; doi:10.1038/s41598-019-41879-7), 2019-03-29
Supplement: 41598_2019_41879_MOESM1_ESM.pdf [file 41598_2019_41879_MOESM1_ESM.pdf]

## **High Incidence of a Novel Rickettsia Genotype in Parasitic**

### ***Haemaphysalis longicornis* from China-North Korea Border**

Heling Xu<sup>1, #</sup>, Qi Zhang<sup>1, #</sup>, Hao Guan<sup>1, #</sup>, Yuening Zhong<sup>1</sup>, Fenghua Jiang<sup>2</sup>, Zeliang Chen<sup>1, \*</sup>, Xiaohu Han<sup>1, \*</sup>

<sup>1</sup> Key Laboratory of Zoonotic of Liaoning Province, College of Animal Science and Veterinary Medicine, Shenyang Agricultural University, Liaoning Province, Shenyang 110866, P. R. China

<sup>2</sup> Dandong Animal Disease Control and Prevention Center, Dandong, Liaoning, P. R. China

# the authors contributed equally to this work

\* Correspondence to Z. Chen [zeliangchen@yahoo.com] or X. Han [hxx8849@163.com]

# Supplementary Dataset

**Figure S1.** Sequence alignment between the *Rickettsia* detected in this study and *R. japonica*. The sequence alignments for *gltA*, *ompA*, and *ompB* were conducted using the Multiple Sequence Alignment in the DNAMAN software.

|          |                              |                                                                                                                             |     |
|----------|------------------------------|-----------------------------------------------------------------------------------------------------------------------------|-----|
| <b>a</b> | gltA-Rickettsia_detected.seq | MGRATTTATCCGCAATTTATGCAATTTAAGGPAAGCAGATTAGCAATTTACGCTATTAGAAATGCTGTAAGATACCTACCTACCTGCTCAATGCTTATPAATATCTATAGCAAC          | 120 |
|          | gltA-R_japonica.seq          | CGSCATTTATCCGCAATTTATGCAATTTAAGGPAAGCAGATTAGCAATTTACGCTATTAGAAATGCTGTAAGATACCTACCTACCTGCTCAATGCTTATPAATATCTATAGCAAC         | 120 |
|          | Consensus                    | CGGCAATTTATCCGCAATTTATGCAATTTAAGGPAAGCAGATTAGCAATTTACGCTATTAGAAATGCTGTAAGATACCTACCTACCTGCTCAATGCTTATPAATATCTATAGCAAC        |     |
|          | gltA-Rickettsia_detected.seq | CGTTTATTTATCCGCAATTTATGCAATTTAAGGPAAGCAGATTAGCAATTTACGCTATTAGAAATGCTGTAAGATACCTACCTACCTGCTCAATGCTTATPAATATCTATAGCAAC        | 240 |
|          | gltA-R_japonica.seq          | CGTTTATTTATCCGCAATTTATGCAATTTAAGGPAAGCAGATTAGCAATTTACGCTATTAGAAATGCTGTAAGATACCTACCTACCTGCTCAATGCTTATPAATATCTATAGCAAC        | 240 |
|          | Consensus                    | CGTTTATTTATCCGCAATTTATGCAATTTAAGGPAAGCAGATTAGCAATTTACGCTATTAGAAATGCTGTAAGATACCTACCTACCTGCTCAATGCTTATPAATATCTATAGCAAC        |     |
|          | gltA-Rickettsia_detected.seq | TTATCCGCAATTTATGCAATTTAAGGPAAGCAGATTAGCAATTTACGCTATTAGAAATGCTGTAAGATACCTACCTACCTGCTCAATGCTTATPAATATCTATAGCAAC               | 360 |
|          | gltA-R_japonica.seq          | TTATCCGCAATTTATGCAATTTAAGGPAAGCAGATTAGCAATTTACGCTATTAGAAATGCTGTAAGATACCTACCTACCTGCTCAATGCTTATPAATATCTATAGCAAC               | 360 |
|          | Consensus                    | TTATCCGCAATTTATGCAATTTAAGGPAAGCAGATTAGCAATTTACGCTATTAGAAATGCTGTAAGATACCTACCTACCTGCTCAATGCTTATPAATATCTATAGCAAC               |     |
|          | gltA-Rickettsia_detected.seq | CTCACGCTGCGGCTATGCAATTTATGCAATTTAAGGPAAGCAGATTAGCAATTTACGCTATTAGAAATGCTGTAAGATACCTACCTACCTGCTCAATGCTTATPAATATCTATAGCAAC     | 480 |
|          | gltA-R_japonica.seq          | CTCACGCTGCGGCTATGCAATTTATGCAATTTAAGGPAAGCAGATTAGCAATTTACGCTATTAGAAATGCTGTAAGATACCTACCTACCTGCTCAATGCTTATPAATATCTATAGCAAC     | 480 |
|          | Consensus                    | CTCACGCTGCGGCTATGCAATTTATGCAATTTAAGGPAAGCAGATTAGCAATTTACGCTATTAGAAATGCTGTAAGATACCTACCTACCTGCTCAATGCTTATPAATATCTATAGCAAC     |     |
| <b>b</b> | ompA-Rickettsia_detected.seq | CAACCCAGCGATAATGCTGACTAGTATGCGGACTGCGCTGCTGCTGAGTGTATTTGCTACTAATATGATCCACATTAGTATGATGCTACGCGCATAATGCAATTTATAGATAA           | 120 |
|          | ompA-R_japonica.seq          | CAACCCAGCGATAATGCTGACTAGTATGCGGACTGCGCTGCTGCTGAGTGTATTTGCTACTAATATGATCCACATTAGTATGATGCTACGCGCATAATGCAATTTATAGATAA           | 120 |
|          | Consensus                    | CAACCCAGCGATAATGCTGACTAGTATGCGGACTGCGCTGCTGCTGAGTGTATTTGCTACTAATATGATCCACATTAGTATGATGCTACGCGCATAATGCAATTTATAGATAA           |     |
|          | ompA-Rickettsia_detected.seq | CGGCGTAGGCGTAGCTATGCTGACTAGTATGCGGACTGCGCTGCTGCTGAGTGTATTTGCTACTAATATGATCCACATTAGTATGATGCTACGCGCATAATGCAATTTATAGATAA        | 240 |
|          | ompA-R_japonica.seq          | CGGCGTAGGCGTAGCTATGCTGACTAGTATGCGGACTGCGCTGCTGCTGAGTGTATTTGCTACTAATATGATCCACATTAGTATGATGCTACGCGCATAATGCAATTTATAGATAA        | 240 |
|          | Consensus                    | CGGCGTAGGCGTAGCTATGCTGACTAGTATGCGGACTGCGCTGCTGCTGAGTGTATTTGCTACTAATATGATCCACATTAGTATGATGCTACGCGCATAATGCAATTTATAGATAA        |     |
|          | ompA-Rickettsia_detected.seq | ATGTTGCGCTACTATCCCGTAGGCTCAAAATATGCTGCAAAATACCGCTGCTGCTGAGTGTATTTGCTACTAATATGATCCACATTAGTATGATGCTACGCGCATAATGCAATTTATAGATAA | 357 |
|          | ompA-R_japonica.seq          | ATGTTGCGCTACTATCCCGTAGGCTCAAAATATGCTGCAAAATACCGCTGCTGCTGAGTGTATTTGCTACTAATATGATCCACATTAGTATGATGCTACGCGCATAATGCAATTTATAGATAA | 360 |
|          | Consensus                    | ATGTTGCGCTACTATCCCGTAGGCTCAAAATATGCTGCAAAATACCGCTGCTGCTGAGTGTATTTGCTACTAATATGATCCACATTAGTATGATGCTACGCGCATAATGCAATTTATAGATAA |     |
|          | ompA-Rickettsia_detected.seq | ATGCTATATGCTGCTGCTGCAAAATATGCTGCAAAATACCGCTGCTGCTGAGTGTATTTGCTACTAATATGATCCACATTAGTATGATGCTACGCGCATAATGCAATTTATAGATAA       | 477 |
|          | ompA-R_japonica.seq          | ATGCTATATGCTGCTGCTGCAAAATATGCTGCAAAATACCGCTGCTGCTGAGTGTATTTGCTACTAATATGATCCACATTAGTATGATGCTACGCGCATAATGCAATTTATAGATAA       | 480 |
|          | Consensus                    | ATGCTATATGCTGCTGCTGCAAAATATGCTGCAAAATACCGCTGCTGCTGAGTGTATTTGCTACTAATATGATCCACATTAGTATGATGCTACGCGCATAATGCAATTTATAGATAA       |     |
| <b>c</b> | ompB-Rickettsia_detected.seq | CGGCAATTTATCCGCAATTTATGCAATTTAAGGPAAGCAGATTAGCAATTTACGCTATTAGAAATGCTGTAAGATACCTACCTACCTGCTCAATGCTTATPAATATCTATAGCAAC        | 518 |
|          | ompB-R_japonica.seq          | CGGCAATTTATCCGCAATTTATGCAATTTAAGGPAAGCAGATTAGCAATTTACGCTATTAGAAATGCTGTAAGATACCTACCTACCTGCTCAATGCTTATPAATATCTATAGCAAC        | 518 |
|          | Consensus                    | CGGCAATTTATCCGCAATTTATGCAATTTAAGGPAAGCAGATTAGCAATTTACGCTATTAGAAATGCTGTAAGATACCTACCTACCTGCTCAATGCTTATPAATATCTATAGCAAC        |     |
|          | ompB-Rickettsia_detected.seq | CGGCAATTTATCCGCAATTTATGCAATTTAAGGPAAGCAGATTAGCAATTTACGCTATTAGAAATGCTGTAAGATACCTACCTACCTGCTCAATGCTTATPAATATCTATAGCAAC        | 596 |
|          | ompB-R_japonica.seq          | CGGCAATTTATCCGCAATTTATGCAATTTAAGGPAAGCAGATTAGCAATTTACGCTATTAGAAATGCTGTAAGATACCTACCTACCTGCTCAATGCTTATPAATATCTATAGCAAC        | 596 |
|          | Consensus                    | CGGCAATTTATCCGCAATTTATGCAATTTAAGGPAAGCAGATTAGCAATTTACGCTATTAGAAATGCTGTAAGATACCTACCTACCTGCTCAATGCTTATPAATATCTATAGCAAC        |     |
